# Supplementary material for: Novel Poly(3-hydroxybutyrate-g-vinyl alcohol) Polyurethane Scaffold for Tissue Engineering
Source: PubMed Central journal article supplement (PMC4977462; doi:10.1038/srep31140), 2016-08-09
Supplement: srep31140-s1.pdf [file srep31140-s1.pdf]

## Novel Poly(3-hydroxybutyrate-g-vinyl alcohol) Polyurethane Scaffold for Tissue Engineering

*Adriana Pétriz Reyes*<sup>1</sup>, *Ataúlfo Martínez-Torres*<sup>1</sup>, *Ma. del Pilar Carreón-Castro*<sup>2</sup>, *José Rogelio Rodríguez Talavera*<sup>3</sup>, *Susana Vargas Muñoz*<sup>3</sup>, *Victor Velázquez Aguilar*<sup>4</sup>, *Maykel González Torres*<sup>2\*</sup>

<sup>1</sup> *Laboratorio de Neurobiología Molecular y Celular, Instituto de Neurobiología, Universidad Nacional Autónoma de México, Querétaro 76230, México.*

<sup>2</sup> *Instituto de Ciencias Nucleares, Universidad Nacional Autónoma de México, México D.F, 04510., México.*

<sup>3</sup> *Centro de Física Aplicada y Tecnología Avanzada, Universidad Nacional Autónoma de México, Querétaro 76230, México.*

<sup>4</sup> *Facultad de Ciencias, Universidad Nacional Autónoma de México, México D.F, 04510., México.*

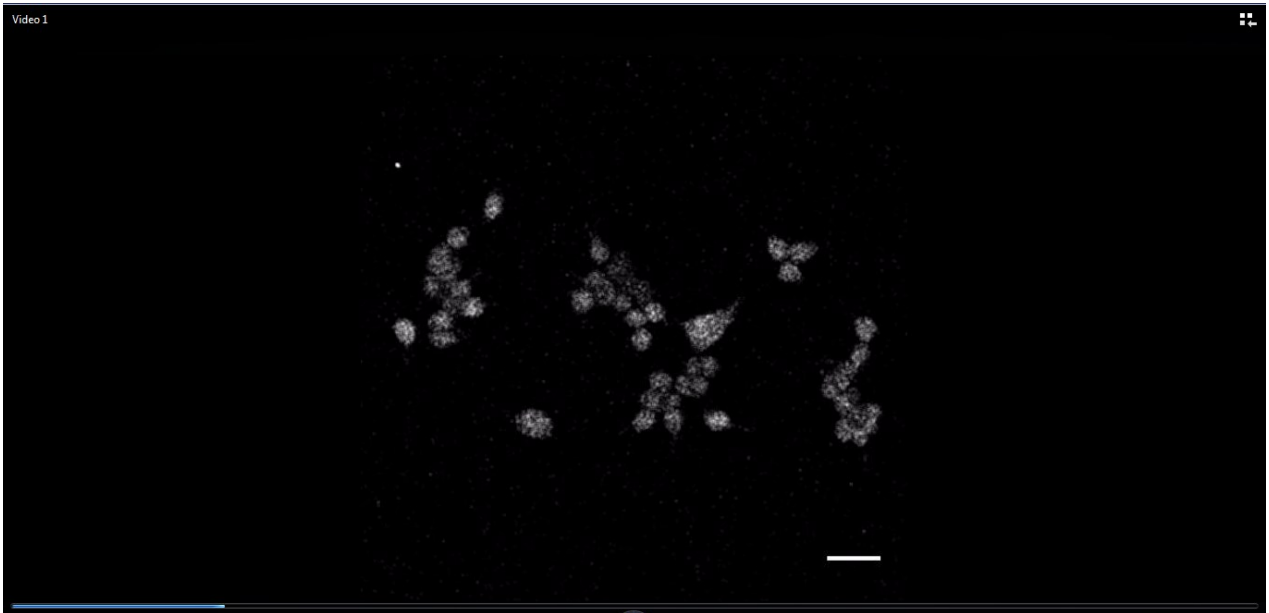

Video 1. Dynamics of cytosolic  $\text{Ca}^{2+}$  monitored by imaging changes of fluorescence intensity before and after adding to the medium the high potassium solution (Time lapse confocal recordings of HEK293 cells).
